# Supplementary material for: Dendrite-free lithium deposition on conventional graphite anode by growth of defective carbon-nanotube for lithium-metal/ion hybrid batteries
Source: Royal Society of Chemistry journal article supplement (doi:10.1039/d2ta01907h), 2022-01-01
Supplement: d2ta01907h1.pdf [file d2ta01907h1.pdf]

## Supplementary Information

# Dendrite-free Lithium Deposition on Conventional Graphite Anode by Growth of Defective Carbon-nanotube for Lithium-metal/ion Hybrid Batteries

Gyuchan Yeo,<sup>a</sup> Jaekyung Sung, <sup>b</sup> Minhong Choi, <sup>a</sup> Namhyung Kim\*<sup>c</sup>, Minseong Ko\*<sup>a</sup>

<sup>a</sup>Department of Metallurgical Engineering, Pukyong National University, Busan 48547,  
Republic of Korea

<sup>b</sup>Department of Nuclear Science and Engineering, Massachusetts Institute of Technology,  
Cambridge, MA, USA

<sup>c</sup>School of Energy and Chemical Engineering Green Energy Materials Development Center,  
Ulsan National Institute of Science and Technology (UNIST), Ulsan 44919, Republic of Korea

E-mail: [namh.kim91@gmail.com](mailto:namh.kim91@gmail.com) (N. Kim), [msko876@pknu.ac.kr](mailto:msko876@pknu.ac.kr) (M. Ko)

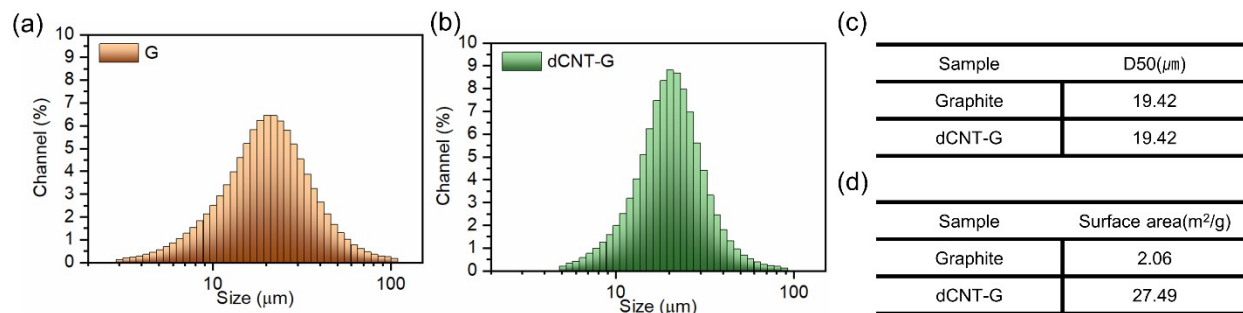

**Figure S1.** PSA result graph of (a) G and (b) dCNT-G. (c) Table of measured D50 by PSA and surface area by BET.

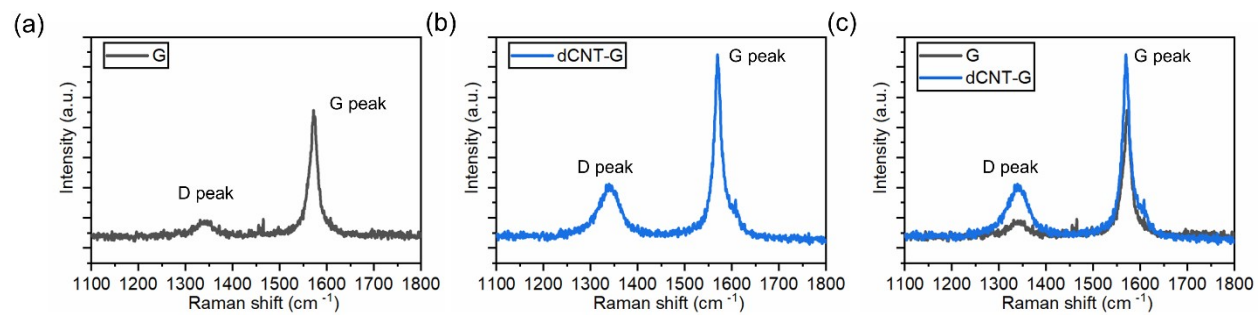

**Figure S2.** Raman spectrum of (a) G, (b) dCNT-G and (c) overlapped graph of G and dCNT-G.

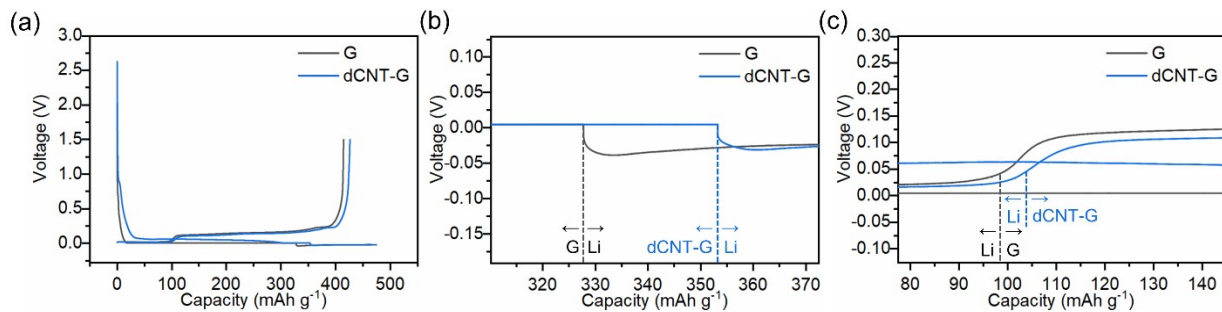

**Figure S3.** (a) Voltage profile of G and CNT-G at first cycle. Enlarged voltage profile at the end point of (b) graphite lithiation and (c) lithium stripping.

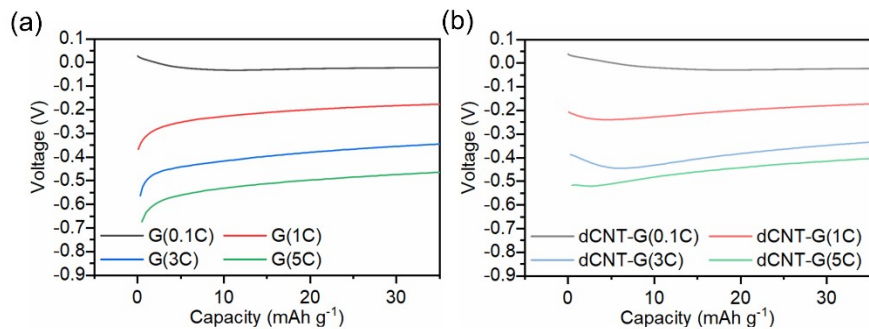

**Figure S4.** Enlarged voltage profile at diverse C-rates for lithium plating process.

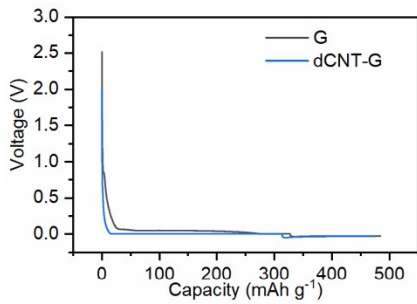

**Figure S5.** Voltage profile of additional lithium plating process of 140mAh g<sup>-1</sup> for lithium half-cell cycling test electrodes.

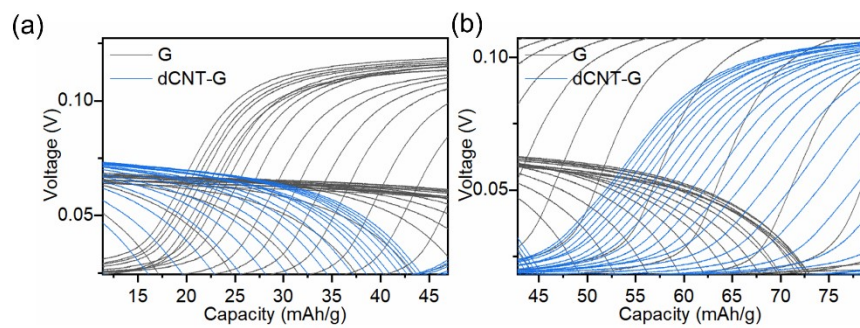

**Figure S6.** Enlarged voltage profile of Figure 3(d) at 50<sup>th</sup> discharge cycle of (a) G and (b) dCNT-G.

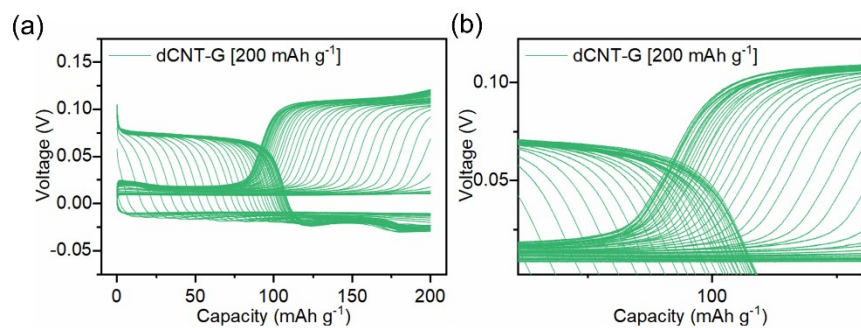

**Figure S7.** (a) Voltage profile for 50 cycles of plated lithium with  $200\text{mAh g}^{-1}$  at dCNT-G electrode. (b) Enlarged voltage profile at 50<sup>th</sup> delitiation.



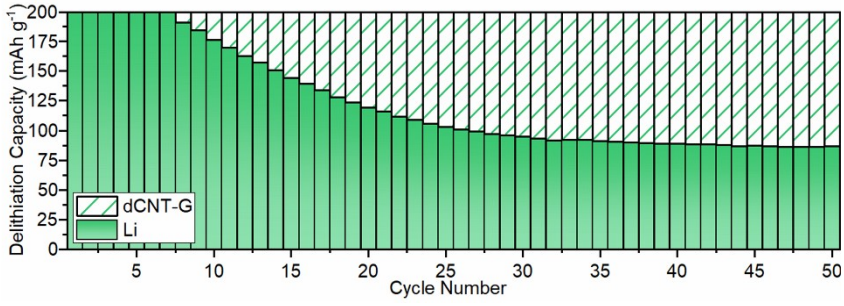

**Figure S8.** Delithiation capacity between lithium and dCNT-G cycle within 200mAh g<sup>-1</sup> of capacity.

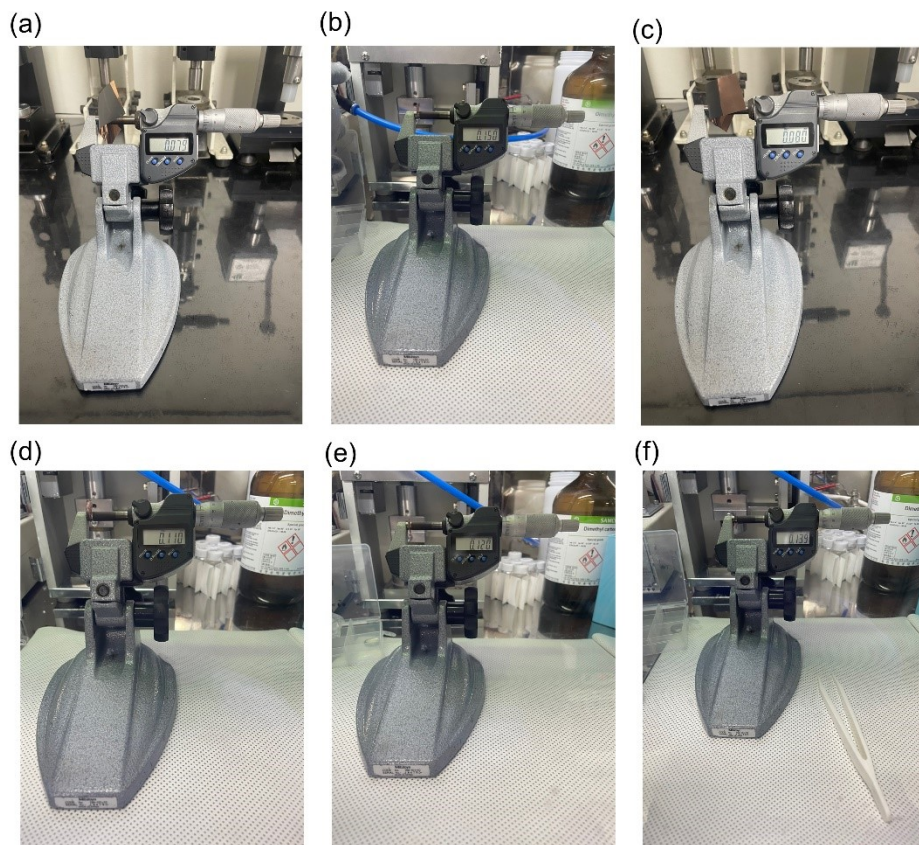

**Figure S9.** Digital photos of (a) initial G electrode, (b) after charging and plating 140mAh g<sup>-1</sup> of lithium, (c) initial dCNT-G electrode, after charging and plating (d) 140mAh g<sup>-1</sup>, (e) 280mAh g<sup>-1</sup>, (f) 470mAh g<sup>-1</sup> of lithium. Overall thickness changes of electrode are displayed at Table S2.

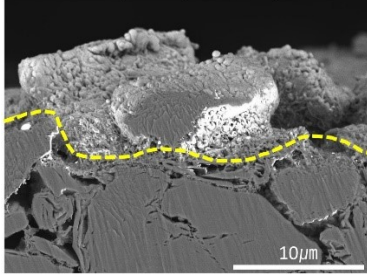

**Figure S10.** High magnification SEM image of dCNT-G/G electrode. Scale bar, 10 $\mu$ m.

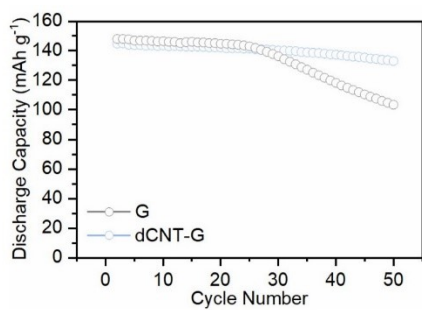

**Figure S11.** Cycling graphs of full-cell with excessive lithium plate anode (cathode: 2.06 mAh cm<sup>-2</sup>, anode: 1.64 mAh cm<sup>-2</sup>). Extra lithium plated electrodes were fabricated by using additional lithium plated electrode at half-cell (0.4 mAh cm<sup>-2</sup>). After lithiation of graphite and lithium plated, coin cells were disassembled to collect electrode and collected electrodes were used as working electrode for full-cell test with 622 NCM at argon-filled glove box.

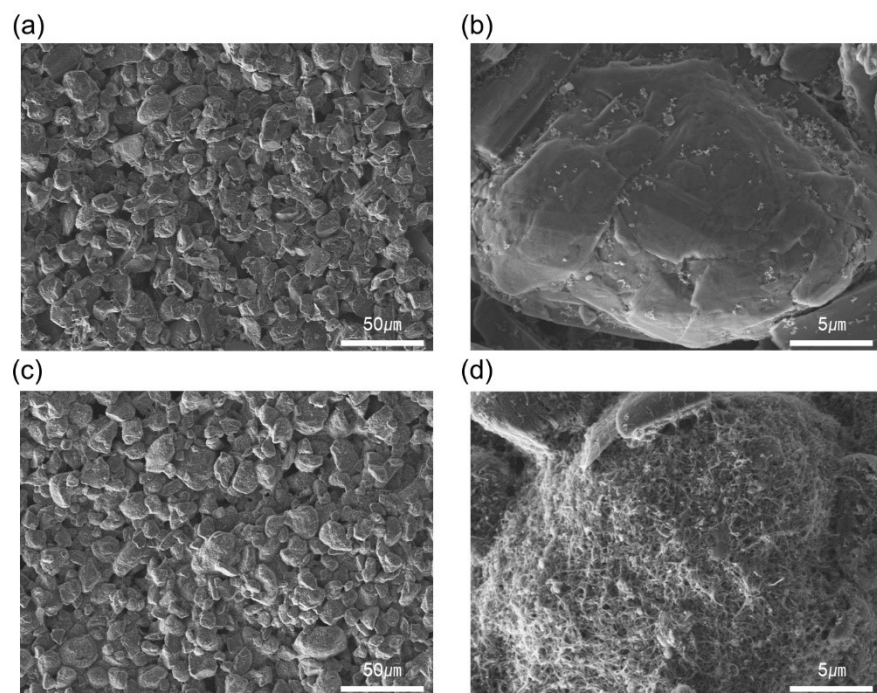

**Figure S12.** SEM image (a) low magnification and (b) high magnification of G electrode and (c) low magnification and (d) high magnification of dCNT-G electrode.

| Sample   | Graphite                                                |                                                           |                      | Lithium                                                |                                                          |                     |
|----------|---------------------------------------------------------|-----------------------------------------------------------|----------------------|--------------------------------------------------------|----------------------------------------------------------|---------------------|
|          | Lithiation Capacity<br>(mAh g <sup>-1</sup> , Graphite) | Delithiation Capacity<br>(mAh g <sup>-1</sup> , Graphite) | ICE<br>(%, Graphite) | Lithiation Capacity<br>(mAh g <sup>-1</sup> , Lithium) | Delithiation Capacity<br>(mAh g <sup>-1</sup> , Lithium) | ICE<br>(%, Lithium) |
| Graphite | 327.75                                                  | 316.93                                                    | 96.6                 | 137.74                                                 | 97.74                                                    | 70.9                |
| dCNT-G   | 353.26                                                  | 324.59                                                    | 91.8                 | 121.73                                                 | 101.77                                                   | 83.6                |

**Table S1.** Independent capacity and initial CE of graphite and lithium based on Fig. S2.

| Sample | Plated amount of Lithium<br>(mAh g <sup>-1</sup> ) | Electrode thickness change<br>( $\mu$ m) |
|--------|----------------------------------------------------|------------------------------------------|
| G      | 140                                                | 71                                       |
| dCNT-G | 140                                                | 30                                       |
| dCNT-G | 280                                                | 40                                       |
| dCNT-G | 470                                                | 59                                       |

**Table S2.** Electrode thickness change of G with 140mAh g<sup>-1</sup> of deposited lithium and dCNT-G electrode with diverse amount of deposited lithium. Electrode thickness was measured by micrometer after disassembly of cell at argon-filled glove box.
